# Supplementary material for: Low-Salt Diet Regulates the Metabolic and Signal Transduction Genomic Fabrics, and Remodels the Cardiac Normal and Chronic Pathological Pathways
Source: MDPI journal article supplement (doi:10.3390/cimb46030150), 2024-03-12
Supplement: s1 [file s1]

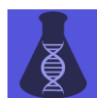

Article

# Low-salt Diet Regulates the Metabolic and Signal Transduction Genomic Fabrics, and Remodels the Cardiac Normal and Chronic Pathological Pathways

Dumitru A. Iacobas <sup>1\*</sup>, Haile Allen <sup>1</sup> and Sanda Iacobas <sup>2</sup>

## Supplementary Materials

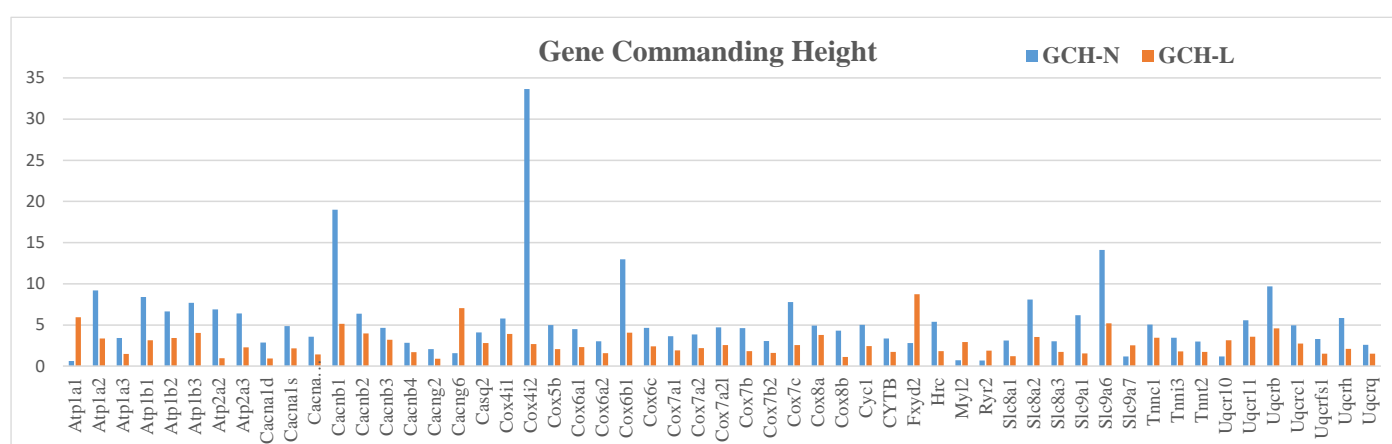

**Figure S1: Gene Commanding Heights (GCH) within the KEGG-constructed CMC (Cardiac Muscle Contraction) pathway [51].**  
Note the reduction of the GCH scores for most CMC genes in LSD.

**Citation:** To be added by editorial staff during production.

Academic Editor: Firstname Last-name

Received: date

Revised: date

Accepted: date

Published: date

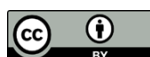

**Copyright:** © 2024 by the authors. Submitted for possible open access publication under the terms and conditions of the Creative Commons Attribution (CC BY) license (<https://creativecommons.org/licenses/by/4.0/>).

# Hypertrophic cardiomyopathy

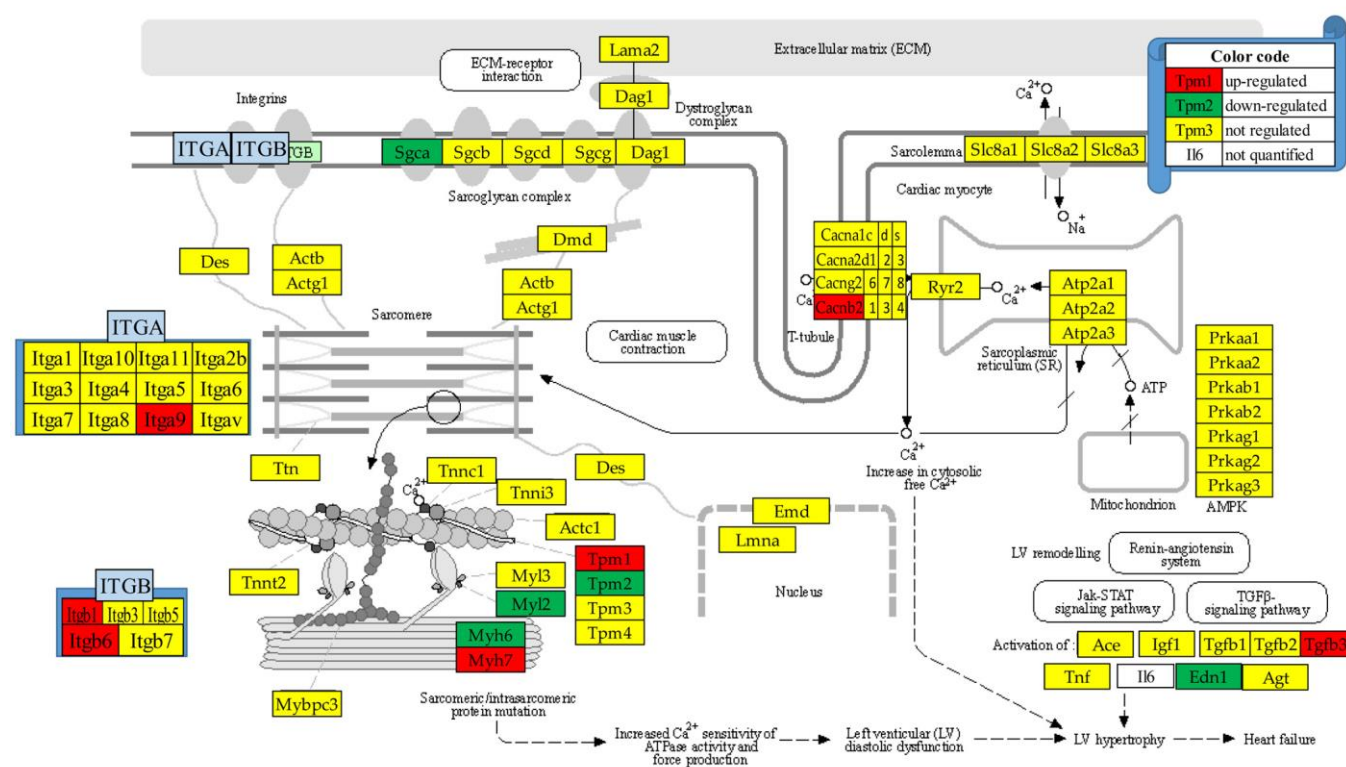

**Figure S2: Regulated genes in the KEGG-constructed pathway Hypertrophic cardiomyopathy. Regulated genes:** *Cacnb2* (calcium channel, voltage-dependent, beta 2 subunit), *Edn1* (endothelin 1), *Itga9* (integrin alpha 9), *Itgb1* (integrin beta 1), *Itgb6* (integrin beta 6), *Myh6/7* (myosin, heavy polypeptide 6, cardiac muscle, alpha/7, cardiac muscle, beta), *Myh2/4* (myosin, light polypeptide 2/4), *Sgca* (sarcoglycan, alpha (dystrophin-associated glycoprotein)), *Tgfb3* (transforming growth factor, beta 3), *Tpm1/2* (tropomyosin 1 alpha/2 beta).
